1 **Glucose-sensing in AgRP neurons integrates homeostatic energy state with**  
2 **dopamine signalling in the striatum.**

3 Alex Reichenbach<sup>1</sup>, Rachel E Clarke<sup>1</sup>, Romana Stark<sup>1</sup>, Sarah Haas Lockie<sup>1</sup>, Mathieu  
4 Mequinion<sup>1</sup>, Felicia Reed<sup>1</sup>, Sasha Rawlinson<sup>1</sup>, Harry Dempsey<sup>1</sup>, Tara Sepehrizadeh<sup>2</sup>,  
5 Michael DeVeer<sup>2</sup>, Astrid C Munder<sup>1,3</sup>, Juan Nunez-Iglesias<sup>5</sup>, David C. Spanswick<sup>1,9</sup>, Randall  
6 Mynatt<sup>6</sup>, Alexxai V. Kravitz<sup>8</sup>, Christopher V. Dayas<sup>7</sup>, Robyn Brown<sup>3,4</sup>, Zane B. Andrews<sup>1</sup>.

7

8 1. Monash Biomedicine Discovery Institute and Department of Physiology, Monash  
9 University, Clayton 3800, Victoria, Australia

10 2. Monash Biomedical Imaging Facility, Monash University, Clayton 3800, Victoria, Australia

11 3. Florey Institute of Neuroscience & Mental Health, Parkville 3052, Victoria, Australia

12 4. Department of Biochemistry and Pharmacology, University of Melbourne, Parkville 3010,  
13 Victoria, Australia.

14 5. Monash Biomedicine Discovery Institute and Department of Anatomy and Developmental  
15 Biology, Monash University, Clayton 3800, Victoria, Australia

16 6 Gene Nutrient Interactions Laboratory, Pennington Biomedical Research Center,  
17 Louisiana State University System, Baton Rouge, Louisiana, USA

18 7 School of Biomedical Sciences and Pharmacy, University of Newcastle, 2308, NSW,  
19 Australia

20 8 Departments of Psychiatry, Anesthesiology, and Neuroscience, Washington University in  
21 St Louis, St Louis, MO, US

22 9 Warwick Medical School, University of Warwick, Coventry CV4 7AL, UK

23

24 **Corresponding author:**

25 Prof Z. B. Andrews: Email: [Zane.Andrews@monash.edu](mailto:Zane.Andrews@monash.edu) Tel: +61 3 9905 8165

26

27 **Disclosure Statement:** The Authors have nothing to disclose

28 **Acknowledgements:**

29 This study was supported by an NHMRC grant and fellowship to ZBA (1126724, 1154974).

30 We would like to thank Miles Billard from TDT for his valuable technical assistance and  
31 support with setting up photometry and analysis. The authors acknowledge the facilities and

32 scientific and technical assistance of the National Imaging Facility, a National Collaborative  
33 Research Infrastructure Strategy (NCRIS) capability, at Monash Biomedical Imaging,

34 Monash University. We would like to thank Professor Alex Fornito for the use of fDOPA in  
35 PET studies. We acknowledge that Bio Render was used to produce elements incorporated

36 in the figure and graphical abstract (Biorender.com).

37 **ABSTRACT**

38 Hunger increases the motivation of an organism to seek out and consume highly palatable  
39 energy dense foods by acting on the midbrain dopaminergic system. Here, we identify a  
40 novel molecular mechanism through which hunger-sensing AgRP neurons detect low energy  
41 availability and modulate dopamine release to increase motivation for food reward.

42 We tested the hypothesis that carnitine acetyltransferase (Crat), a metabolic enzyme  
43 regulating glucose and fatty acid oxidation, in AgRP neurons is necessary to sense low  
44 energy states and regulate motivation for food rewards by modulating accumbal or striatal  
45 dopamine release. In support of this, electrophysiological studies show that AgRP neurons  
46 require Crat for appropriate glucose-sensing. Intact glucose-sensing in AgRP neurons  
47 controls post-ingestive dopamine accumulation in the dorsal striatum. Fibre photometry  
48 experiments, using the dopamine sensor GRAB<sub>DA</sub>, revealed that impaired glucose-sensing,  
49 in mice lacking Crat in AgRP neurons, reduces dopamine release in the nucleus accumbens  
50 to palatable food consumption and during operant responding, particularly in the fasted  
51 state. Finally, the reduced dopamine release in the nucleus accumbens of mice lacking Crat  
52 in AgRP neurons affects sucrose preference and motivated operant responding for sucrose  
53 rewards. Notably, these effects are potentiated in the hungry state and therefore highlight  
54 that glucose-sensing by Crat in AgRP neurons is required for the appropriate integration and  
55 transmission of homeostatic hunger-sensing to dopamine signalling in the striatum. These  
56 studies offer a novel molecular target to control the overconsumption of palatable foods in a  
57 population of hunger-sensing AgRP neurons.

58

59

60

61

62

63

64

## 65 INTRODUCTION

66 The motivation to approach and consume food depends not only on the palatability and  
67 caloric density of the available food source, but also on the energy state of the organism. For  
68 example, when food is abundant many prey species forage within known territories to  
69 reduce survival threats<sup>1</sup>. Conversely, when food is scarce, animals are motivated to take  
70 greater risks and forage within unfamiliar territories to search for food<sup>2</sup>. Thus, the motivation  
71 to seek palatable, energy-dense food evolved as a key mechanism for survival and  
72 maturation in an environment with limited food availability. Given that heightened motivation  
73 for palatable food in an environment of low food availability shaped an evolutionary benefit, it  
74 is not surprising that homeostatic feeding circuits responding to energy state can have a  
75 profound effect on motivation. In today's society with high caloric foods readily available,  
76 these circuits may contribute to the overconsumption of highly palatable and calorie dense  
77 foods, which is a leading cause for today's obesity crisis. Indeed, human evidence shows  
78 that fasting biases reward systems to high caloric foods<sup>3,4</sup>.

79 Agouti-related peptide (AgRP) neurons in the arcuate nucleus of the hypothalamus (ARC)  
80 are a critical population of hunger-sensitive neurons that primarily function to increase  
81 appetite or conserve energy<sup>5-9</sup>. A key element of appetitive behaviour is the increased  
82 motivation for goal-directed outcomes. Intriguingly, hunger associated with fasting or calorie  
83 restriction has been used for decades in behavioural neuroscience to improve performance  
84 and learning in operant tasks. AgRP neurons function within this framework by increasing  
85 the willingness to work for food and food rewards. For example, activation of AgRP neurons  
86 makes mice more willing to work for food or food rewards at the same level as that seen in  
87 fasted mice<sup>7,10-12</sup>. Moreover, AgRP neurons transmit energy-state information to circuits  
88 involved in motivation<sup>13-15</sup>, with the activation of AgRP neurons elevating dopamine release  
89 in response to food availability<sup>13</sup>. Given that AgRP neurons are most active during periods of  
90 energy deficit<sup>16-20</sup>, they are a critical neural population that transmits low energy, hunger-  
91 specific metabolic information to motivation circuits. However, a fundamental gap in  
92 knowledge exists; what are the molecular mechanisms that enable AgRP neurons to sense  
93 changes in energy-state and integrate this metabolic information into neural circuits that  
94 reinforce food value and motivate feeding behaviours?

95 Sensory cues that predict food availability and palatability rapidly suppress hunger-sensitive  
96 AgRP neuronal activity in hungry mice<sup>11,18,21,22</sup>. Although this decrease in activity occurs prior  
97 to food consumption, post-ingestive caloric feedback is required to sustainably reduce AgRP  
98 neuronal activity<sup>22,23</sup>, as this effect was not observed after repeated ingestion of a non-  
99 caloric sweetened gel. Su et al show also that the reduction of AgRP neuronal activity  
100 correlates with the number of calories ingested<sup>22</sup>. These studies highlight that the  
101 maintenance of normal AgRP activity in response to post-ingestive gastrointestinal feedback

102 requires metabolic sensing of available calories in combination with gut-brain neural  
103 communication<sup>22-24</sup>. Given that AgRP neurons increase food motivation by engaging  
104 midbrain dopamine circuits and require appropriate metabolic sensing of available calories  
105 for their normal function, we hypothesized that metabolic sensing of calorie availability is  
106 necessary for AgRP neurons to transmit energy-state information to pathways that control  
107 motivated behaviour towards a palatable food reward.

108 Previously we demonstrated that carnitine acetyltransferase (Crat) in AgRP neurons was  
109 required as a molecular sensor for peripheral substrate utilisation during fasting and  
110 refeeding<sup>25</sup>. Moreover, Crat in AgRP neurons programmed a broad metabolic response of  
111 the AgRP proteome and was required to promote normal refeeding after fasting<sup>25</sup>. Given this  
112 reduced appetitive drive in KO mice, we hypothesised that Crat in AgRP neurons would  
113 translate metabolic information about low energy state into neural circuits controlling  
114 dopamine signalling and the motivational aspects of food-directed behaviour.

115 Here we describe experiments demonstrating that Crat is important for glucose-sensing in  
116 AgRP neurons. Moreover, the absence of Crat in AgRP neurons reduced motivated  
117 behaviour during an operant task and dopamine release in the nucleus accumbens (NAc)  
118 during operant responding for and consumption of a palatable food reward. These studies  
119 highlight that glucose-sensing by Crat in AgRP neurons is required for the appropriate  
120 integration of hunger-sensing to potentiate food reward-related dopamine release in the NAc  
121 and control motivation for palatable food rewards.

122

123

124

125

126

127

128

129

130

131

132

## 133 **Methods**

### 134 Animals

135 All experiments were conducted in compliance with the Monash University Animal Ethics  
136 Committee guidelines. Male and female mice were kept under standard laboratory  
137 conditions with free access to food (chow diet, catalog no. 8720610, Barastoc Stockfeeds,  
138 Victoria, Australia) and water at 23C in a 12-hr light/ dark cycle and were group-housed to  
139 prevent isolation stress unless otherwise stated. All mice were aged 8 weeks or older for  
140 experiments unless otherwise stated. AgRP-ires-cre mice were obtained from Jackson  
141 Laboratory AgRP<sup>tm1(cre)Low/J</sup> (stock no. 012899) and bred with NPY GFP mice (B6.FVB-  
142 Tg(Npy-hrGFP)1Low/J; stock number 006417; The Jackson Laboratory, Maine, USA).  
143 AgRP-ires-cre::NPY GFP mice were then crossed with Crat<sup>fl/fl</sup> mice donated by Randall  
144 Mynatt (Pennington Biomedical Research Center, LA, USA) in order to delete Crat from  
145 AgRP neurons (AgRP<sup>cre/wt</sup>::Crat<sup>fl/fl</sup> mice; designated as KO). AgRP<sup>wt/wt</sup>::Crat<sup>fl/fl</sup> littermate mice  
146 were used as control animals (designated as WT)

147

### 148 Electrophysiology

149 Animals were fasted overnight and 250 µm thick coronal hypothalamic brain slices  
150 containing the ARC were prepared from 10 male AgRP Crat KO and 9 WT mice (8-12  
151 weeks) expressing GFP in NPY neurons, and stored at room temperature before transferral  
152 to the recording chamber. Slices were continuously superfused at 4-5 ml/min with  
153 oxygenated (95% O<sub>2</sub>, 5% CO<sub>2</sub>) artificial cerebrospinal fluid (aCSF) of the following  
154 composition (in mM): NaCl 127, KCl 1.9, KH<sub>2</sub>PO<sub>4</sub> 1.2, CaCl<sub>2</sub> 2.4, MgCl<sub>2</sub> 1.3, NaHCO<sub>3</sub> 26, D-  
155 Glucose 2, Mannitol 8 (310 mOsm, pH 7.4). Hypothalamic neurons were visualised under IR  
156 illumination using a 63x or 40x water immersion objective on an upright microscope  
157 (Axioskop 2, Zeiss) and an Axiocam MRm camera (Zeiss). AgRP neurons were identified  
158 using a GFP filter set. Patch pipettes (8-11 MΩ) were pulled from borosilicate glass  
159 capillaries (Harvard Apparatus) and filled with intracellular solution containing (in mM): K-  
160 gluconate 140, KCl 10, EGTA 1, HEPES 10, Na-ATP 2, Na-GTP 0.3 (300 mOsm and pH  
161 7.3, adjusted with KOH). Whole-cell current clamp recordings were made using the  
162 MultiClamp 700B amplifier, digitized with the Digidata 1550B interface, and acquired in  
163 pClamp 10.6 at 5 kHz sampling rate (Axon Instruments). To test the influence of an elevated  
164 extracellular glucose concentration on neural activity, aCSF was prepared as described  
165 above with the following changes: D-Glucose 5mM, Mannitol 5mM, and bath-applied for 10-  
166 15min. Data were analysed in Clampfit 10.6 (Axon Instruments) and plotted in Graphpad  
167 Prism 8.3. Figures were further prepared in Adobe Illustrator CC 2020.

168

### 169 Two bottle choice tests

170 Male and female mice were single housed in BioDaq feeding cages with *ad libitum* access to  
171 chow and two water bottles. After 3 days of acclimatisation, one bottle was filled with 0.1%  
172 saccharin and position of bottles swapped daily. After 4 days *ad libitum* feeding, mice were  
173 overnight fasted with only access to drink bottles followed by 2 days wash out period with ad  
174 lib access to water and chow. In the same manner mice were presented with choice of 4%  
175 sucrose and 0.1% saccharin solutions in week 2 and 4% sucrose laced with quinine HCl  
176 (concentrations for different cohorts ranging from 0.1 to 0.5mM) and 0.1% saccharin in week  
177 3 of the experiment.

178

### 179 PET/CT and MRI

180 Mice were single housed and trained to receive a single Reese's® peanut butter chip 6 hours  
181 into the light phase (time of PET scan) for 1 week. The day before PET/CT scans, mice were  
182 fasted overnight (18 hours) with ad lib access to water. On the experimental day, mice were  
183 injected IP with 10mg/kg Benserazide (Selleckchem.com) and 10mg/kg Entacapone  
184 (Selleckchem.com) 30 minutes before injecting radiolabelled fDOPA (approx. 5MBq) into the  
185 tail vein. After 5 min rest, mice received 1 peanut butter chip and only those mice that  
186 initiated feeding with the first minute were included in the analysis. Then mice were  
187 anaesthetised (1-2.5% isoflurane) and a 65 min PET/CT scan was performed under  
188 anaesthesia. The scan was acquired using the Inveon scanner (Siemens Inveon). CT was  
189 generated using the following parameters: 97µm of resolution, 80kV voltage and 500uA  
190 current, mainly for attenuation correction and MRI overlaying purposes. PET scans were  
191 acquired for 60 minutes (16 time frames). One week later MRI scan was performed on these  
192 animals to generate T2 weighted images using these parameters: 3D Flash sequence,  
193 TE/TR=8/60ms, 4 averages, flip angle= 10 degree, resolution = 0.155 mm<sup>3</sup>, scan time 20  
194 minutes. PET images were analysed using IRW software (Inveon Research Workplace 4.2).  
195 PET/CT images were overlaid manually with the T2-Weighted images. Region of Interests  
196 (ROIs) were generated carefully by one investigator (AR) on the T2 images on left/right  
197 ventral striatum, left/right dorsal striatum and cerebellum (according to Allen brain atlas) and  
198 PET voxel intensities (Unit Bq/ml) at 3 different time points were exported for further  
199 analysis. We specifically choose to use the ventral striatum, rather than the NAc, due to  
200 greater accuracy with ROI identification. SUV (Standardized Uptake Value) of ROIs were  
201 calculated for each time point using the following equation:

$$202 \text{ SUV} = C_{\text{PET}}(T) / (\text{Dose} / \text{Weight})$$

$$203 C_{\text{PET}}(T) = \text{Tissue radioactivity concentration at time } T$$

$$204 \text{ Dose} = \text{administration dose at time of injection (decay corrected to the time points)}$$

$$205 \text{ Weight} = \text{animal body weight}$$

206 To eliminate bias for slight variation of size/location of ROI we used upper bound Bq/ml  
207 values to calculate SUVmax<sup>26</sup> and normalised to cerebellum as reference:

208  $SUVR_{max} = \text{SUV}_{max \text{ target}} / \text{SUV}_{max \text{ reference}}$

209

#### 210 Fiber photometry

211 Mice for fiber photometry experiments were anesthetised (2-3% isoflurane) and injected with  
212 Metacam (5 mg/kg) prior to placing into stereotaxic frame (Stoelting/Kopf) on heatpad (37C)  
213 and viral injections were performed as previously described<sup>27</sup>. Non-cre dependent dopamine  
214 sensor (YL10012-AAV9: AAV-hSyn-DA4.3)<sup>28</sup> was injected (2x150nl @25nl/min, 5 min rest)  
215 in dorsal striatum (bregma 0.5mm, midline 1.3 mm. skull -3.4mm) or NAc (bregma 1.2mm,  
216 midline 0.5 mm. skull -4.8mm) and ferrule capped fibres (400µm core, NA 0.48 Doric,  
217 MF1.25 400/430-0.48) implanted above injection site and secured with dental cement  
218 (GBond, Japan). Mice had 2 weeks recovery before commencement of experiments.

219 All fiber photometric recordings were performed with a rig using optical components from  
220 Doric lenses controlled by Tucker Davis Technologies fiber photometry processor RZ5P.  
221 TDT Synapse software was used for data acquisition. Prior to experiments, baseline  
222 dopamine signal was measured and LED power was adjusted for each mouse to achieve  
223 approximately 200mV for 465nm and 100mV for 405nm. Data analysis was done using  
224 modified python code provided by TDT<sup>29,30</sup>. The modified code is available at  
225 [github/AlexReichenbach](https://github.com/AlexReichenbach) upon publication. Briefly, raw traces were down sampled and fitted  
226 to detrend signal bleaching and z-scores around precisely timed TTL-triggered events were  
227 extracted. To measure dopamine release to non-food-object/chow/peanut butter chip, single-  
228 housed mice with fiber implants were habituated to receiving Reese's® peanut butter chips  
229 in the home cage. On the test day mice were connected to fiber photometry setup in their  
230 home cage and a small ceramic bowl placed inside. Recording started after 5 minutes  
231 acclimation period. In 2 minute intervals a small wood dowel (novel non-food object), a chow  
232 pellet, and a peanut butter chip were dropped into the ceramic bowl in that order. Mice  
233 were fed or fasted in random cross over design.

234

#### 235 Operant conditioning task

236 For operant conditioning experiments, Feeding Experiment Devices version 3 (FED3)<sup>31</sup> were  
237 placed overnight (16h) inside home cages under *ad libitum* conditions trained to reliably  
238 nose poke on fixed ratio (FR)1, FR3 and FR5 schedules (criteria to move to higher schedule  
239 was 3 consecutive days over 75% correct nose pokes) The dispensing of a sugar pellet  
240 (20mg, 65% sucrose, 5TUT Test Diets, Saint Louis, Missouri, USA) was paired with an LED  
241 light cue. During these FR sessions, a nose poke in the 'active' hole resulted in the delivery  
242 of a sugar pellet and was paired with a LED light cue whereas a nose poke in the 'inactive'

243 hold resulted in no programmed response. Importantly, mice were never food restricted  
244 during training to prevent this confounding the interpretation of our results. Once stable  
245 operant responding was established (> 75% correct nose pokes on FR5) mice were placed  
246 on a progressive ratio (PR) schedule under *ad libitum* fed conditions for a single overnight  
247 PR session (16 h). PR sessions were based on a Richardson Roberts schedule<sup>32</sup> where the  
248 number of pokes required to obtain a reward increased after every completed trial in the  
249 following pattern; 1, 2, 4, 6, 9, 12, 15, 20, 25, 32, etc. After this single PR session, stable  
250 FR5 responding was re-established (>75% correct nose pokes, typically 1 FR session) and a  
251 second PR session was performed except this time mice were fasted 16h prior to the PR  
252 session. Separate cohorts with fiber implants in the dorsal striatum or NAc were trained to  
253 receive sugar rewards as described above and dopamine responses to both nose pokes and  
254 sugar pellet retrieval were recorded in fed state or after an overnight fast.

255

### 256 Immunohistochemistry

257 To confirm viral injection and fiber placements, animals were deeply anesthetized with  
258 isoflurane and perfused with 0.05 M PBS, followed by 4% paraformaldehyde. Brains were  
259 postfixed in 4% paraformaldehyde overnight at 4°C then placed in 30% sucrose. Brains were  
260 cut at 40 µm on a cryostat, and every fourth section was collected and stored in  
261 cryoprotectant at -20°C. Sections were washed in 0.1 M phosphate buffer (PB), incubated  
262 with 1% hydrogen peroxide (H<sub>2</sub>O<sub>2</sub>) for 15 minutes to prevent endogenous peroxidase,  
263 activity, and blocked for 1 hour with 5% normal horse serum (NHS) in 0.3% Triton in 0.1 M  
264 PB. Sections were incubated with chicken anti-GFP (ab13970, Abcam) at 1:1000 in diluent  
265 of 5% NHS in 0.3% Triton in 0.1 M PB. After incubation, the sections were washed and  
266 incubated with Alexa Fluor goat anti-chicken 488 antibody (Invitrogen) at 1:500 in 0.3%  
267 Triton in 0.1 M PB. Sections were then washed, mounted, and coverslipped.

268

### 269 Statistical analysis

270 Statistical analyses were performed using GraphPad Prism for MacOS X. Data are  
271 represented as mean ± SEM. Two-way ANOVAs with post hoc tests were used to determine  
272 statistical significance. A two-tailed Student's unpaired t test was used when comparing  
273 genotype only.  $p < 0.05$  was considered statistically significant.

274

275



276 **RESULTS**

277 **Crat deletion impairs AgRP neuron glucose sensing**

278 In order to demonstrate that Crat in AgRP neurons is important for glucose-sensing, we  
279 prepared hypothalamic brain slices from WT and KO mice for electrophysiological  
280 characterisation of glucose sensing in AgRP neurons. We detected no differences in the  
281 fundamental electrophysiological properties of AgRP neurons including resting membrane  
282 potential (Fig 1A), input resistance (Fig 1B), spontaneous firing frequency (Fig 1C), although  
283 peak action potential amplitude, was significantly lower in KO mice (Fig 1D). Collectively,  
284 these studies demonstrate that Crat in AgRP neurons has little effect on the intrinsic  
285 electrophysiological properties of the cell. Similarly, no genotype-dependent changes in the  
286 frequency of spontaneous excitatory or inhibitory post-synaptic potentials (EPSPs or IPSPs,  
287 respectively) were detected (Fig 1E-F), indicating no differences in the extrinsic synaptic  
288 input in WT compared to KO mice. To show that AgRP neurons require Crat for glucose  
289 sensing we recorded AgRP neuronal responses to an increase in extracellular glucose from  
290 a basal level of 2mM to 5mM. These glucose concentrations were chosen to represent brain  
291 glucose concentrations under fasting and fed conditions, based on glucose concentration  
292 estimated in the CSF from fasted and fed rats and mice<sup>33</sup>. Glucose-excited neurons were  
293 defined based upon a response characterised by membrane potential depolarization and/or  
294 an increase in action potential firing frequency with increased extracellular glucose (Fig1 I).  
295 Glucose-inhibited cells were identified by responses to increased glucose characterised by  
296 membrane potential hyperpolarisation and/or a reduction in spontaneous action potential  
297 firing frequency (Fig1 I). In WT mice, 48% of cells (n=10/21) were excited, 33% of cells  
298 (n=7/21) were inhibited and 19% (n=4/21) were insensitive to changes in extracellular  
299 glucose (Fig 1G). In KO mice, the number of glucose-excited cells was reduced compared to  
300 WT with only 28% classified as glucose excited (n=7/25). Similarly, the incidence of glucose-  
301 inhibited cells was reduced to 16% (n=4/25) of the population compared to WT mice with the  
302 majority of cells not responding to 5mM glucose 56% (n=14/25) and classified as glucose  
303 insensitive (Fig 1H). In total 17/21 AgRP neurons responded to an increase in extracellular  
304 glucose in WT mice, whereas as only 11/25 AgRP neurons responded to glucose in KO  
305 mice, representing a decrease in glucose-responsive neurons (WT 81% vs KO 44%). These  
306 results show Crat deletion impairs intrinsic glucose-sensing capability of AgRP neurons.

307

308 **Metabolic sensing in AgRP neurons translates low energy state to increase sucrose**  
309 **consumption**

310 Previous studies show that activation of AgRP neurons increases lick bouts for progressively  
311 higher concentrations of sucrose and increases the tolerance for bitter tastant in sucrose  
312 solution<sup>34</sup>. These studies suggest an inherent physiological ability for AgRP neurons to

313 detect current energy state and promote the appropriate behavioural response to restore it  
314 to equilibrium (or whatever word is appropriate when it comes to energy state). To test this,  
315 we used AgRP Crat KO mice, which have impaired glucose sensing and reduced refeeding  
316 after fasting<sup>25</sup> and investigated whether Crat deletion affects the rewarding properties of  
317 sucrose, using 2-bottle choice experiments. Initial experiments show that WT and KO mice  
318 prefer a non-caloric sweetened drink (0.1% saccharin) over water suggesting that Crat  
319 deletion does not affect taste perception or causes anhedonia (Fig 2A). We next compared  
320 sucrose vs saccharin consumption in fed WT and KO mice and although mice preferred  
321 sucrose, there were no genotype differences in either the amount consumed or the  
322 preference (Fig 2B, Supp Fig 1A). However, in fasted mice, there was a significantly reduced  
323 preference for sucrose in KO compared to WT mice (Fig 2C, see also Supp Fig 1B, E, F;  
324 71.2% vs 93.9% respectively,  $p \leq 0.05$ ).

325 Bitter tastes such as quinine or denatonium are often used as adulterants to create taste  
326 aversions and suppress intake. However, both fasting and AgRP neuronal stimulation drive  
327 greater consumption of sucrose in the presence of bitter tastes<sup>34</sup>, implying that AgRP  
328 neurons are important to detect changes in energy state associated with fasting and  
329 prioritise calories over taste. In order to test this, we repeated the sucrose saccharin  
330 preference tests but with bitter tasting quinine added to the sucrose solution. Pairing the  
331 caloric solution with an unpalatable taste shifts the preference to saccharin in KO, with WT  
332 mice showing no preference (Fig 2D, Supp Fig 1C). Strikingly, an overnight fast increases  
333 the preference for the quinine-laced sucrose solution in WT, but not in KO mice (Fig 2E,  
334 Supp Fig 1D), resulting in a significant increase in preference from fed to fasted in WT mice  
335 (Fig 2F) but no change in preference in KO mice (Fig 2G). There was no genotype  
336 difference in total consumption across the different comparison (Fig 2H), indicating this did  
337 not affect preference, and KO mice showed significantly reduced sucrose consumption in a  
338 quinine dose response curve (Fig 2I). Collectively, these data show that Crat mediates the  
339 ability of AgRP neurons to respond to fasting and increase calorie intake through greater  
340 sucrose consumption, even in the presence of quinine to devalue the consumption of  
341 sucrose.

342

### 343 **Metabolic sensing via Crat in AgRP neurons affects mesolimbic dopamine pathways**

344 Previous studies show that activation of AgRP neurons modulates dopamine release in the  
345 NAc<sup>13</sup> and neural encoding of non-caloric and caloric solutions are differentially processed in  
346 the NAc and dorsal striatum respectively<sup>35</sup>. Based on the observed differences in sucrose  
347 consumption and sucrose/quinine consumption under fasted conditions presented above  
348 (Fig 2), we hypothesized that KO mice would show reduced dopamine release in the dorsal  
349 striatum. To investigate this, we first employed a positron electron tomography (PET)

350 method using radiolabelled 18F-fDOPA (Supp Fig 1G). First, we measured dynamic basal  
351 dopamine uptake in ventral and dorsal striatum in fasted mice without reward presentation  
352 and observed no differences in fDOPA uptake (Supp Fig 1J, K) suggesting Crat deletion in  
353 AgRP neurons does not affect baseline uptake parameters. However, in response to peanut  
354 butter chip consumption, we detected an increase in fDOPA accumulation 30 minutes after  
355 starting in the dorsal striatum of WT but not in KO mice (Supp Fig 1H) and no differences in  
356 the ventral striatum (Supp Fig 1I), suggesting that Crat deletion in AgRP neurons restricts a  
357 post-ingestive dopamine response to peanut butter chip consumption in the dorsal striatum.  
358 Although this approach provided important information on the uptake of dopamine in the  
359 dorsal striatum, it lacks the temporal and spatial resolution to examine acute dopamine  
360 release in the NAc or dorsal striatum to food reward approach and consumption. This is an  
361 important issue since a study using human subjects showed that there are two temporally  
362 and spatially distinct dopamine responses to ingesting a milkshake<sup>36</sup>, one immediate  
363 orosensory response (to taste) and a second delayed post-ingestive response (to calories).  
364 To overcome the resolution issue of our PET/CT scans we switched to *in vivo* fiber  
365 photometry measuring dopamine release using the recently developed GRAB<sub>DA</sub> sensor<sup>28</sup>.  
366 This allowed us to measure dopamine signalling in freely behaving mice consuming a  
367 peanut butter chip. Acute dopamine release in the NAc was measured using GRAB<sub>DA</sub> in  
368 response to a non-food object (wood dowel), chow food and a peanut butter chip with each  
369 presentation separated by 2 mins (presented in that order) (Fig 3A, B) and observed a  
370 significant increase in dopamine release in response to chow and peanut butter chip when  
371 compared to wood dowel in both fed and fasted WT mice (Fig 3C-J). Strikingly, KO mice did  
372 not show a similar significant increase in NAc dopamine release, as assessed by AUC,  
373 following chow and a peanut butter chip presentation in the fed state and this was  
374 significantly lower compared to WT fed mice (Fig 3E, F). In the fasted state, KO mice  
375 showed accumbal dopamine release in response to PB but significantly lower than that seen  
376 in WT fasted mice (Fig 3I, J). Time to food contact and time spent eating were not  
377 significantly different in WT and KO mice in fed or fasted state (Fig 3P, Q), showing that  
378 these factors could not account for differences in dopamine release in the NAc. Furthermore,  
379 aligning the dopamine signal to the beginning of peanut butter chip consumption shows that  
380 KO mice have diminished dopamine release during peanut butter chip consumption (Fig 3K-  
381 O). Taken together, these results highlight that Crat deletion in AgRP neurons reduced acute  
382 dopamine release in the NAc in both fed and fasted states in response to chow and a peanut  
383 butter chip.  
384 We used the same protocol to measure acute dopamine release in the dorsal striatum in  
385 response to a wood dowel, chow food and a peanut butter chip with each presentation  
386 separated by 2 mins (Supp Figure 2A, B). Although we observed a main effect for peanut

387 butter chip to acutely increase dopamine release in the dorsal striatum, there were no  
388 significant genotype differences in either the fed or fasted state and no differences in time to  
389 contact with a peanut butter chip or time spent eating a peanut butter chip, as assessed by  
390 video analysis (Supp Fig 2).

391

### 392 **Glucose-sensing via Crat in AgRP neurons affects motivation and dopamine release** 393 **during operant responding for a sucrose reward**

394 The majority of operant conditioning protocols are conducted in stand-alone operant  
395 chambers and typically include a mild calorie restriction to facilitate learning of the  
396 instrumental task. This exploits the fact that food restriction enhances appetitive drive, which  
397 is a result of elevated AgRP neuronal activity<sup>7,12</sup>. To avoid this potential confound we used  
398 the open source FED3<sup>31</sup> operant devices that are placed in the home cage and can be left  
399 for long periods of time, which facilitates learning in a low stress environment. As such,  
400 instrumental learning can be acquired quickly and easily in *ad libitum* fed mice using FED3  
401 devices without the need for caloric restriction – an important consideration for our  
402 experiments (Fig 4A). There were no differences in operant responding during FR sessions  
403 (Supp Fig 3C), indicating no differences in learning the operant task. In order to test  
404 motivation, progressive ratio sessions were performed overnight with (fed) and without  
405 access (fasted) to chow. During fed conditions, WT and KO mice displayed similar  
406 breakpoint ratios (Fig 4B), however under fasting conditions KO mice showed a reduced  
407 breakpoint compared to WT mice. Active (Fig 4C) but not inactive nosepokes (Supp Fig 3B)  
408 during the fasted progressive ratio session were significantly lower in KO mice compared to  
409 WT, as well as pellets received during the progressive ratio session (Supp Fig 3A). These  
410 results demonstrated that Crat deletion in AgRP neurons reduces motivation for sucrose  
411 rewards when mice are fasted but not fed, suggesting that the appropriate detection of low  
412 energy state by AgRP neurons affects motivation for a palatable food reward.

413 In order to establish that deficits in motivation were associated with impaired dopamine  
414 release in the NAc or dorsal striatum, we used FED3 as it allows for programmable TTL  
415 output to synchronize nose poking and pellet retrieval with measurements of dopamine  
416 release by GRAB<sub>DA</sub> photometry (Fig 4D, E). Dopamine release was measured during a  
417 progressive ratio allowing us to align dopamine responses to rewarded or non-rewarded  
418 nose pokes (see Supp Fig 3D and E for example traces). In fed WT mice, a rewarded nose  
419 poke increased NAc dopamine release whereas a non-rewarded nose poke did not (Fig 4F-  
420 H). In fed KO mice, we did not observe an increase in accumbal dopamine in response to a  
421 rewarded nose poke within the 10 second window (Fig 4G). This was likely due to the  
422 significant increase in pellet retrieval time observed in KO fed mice compared to WT fed  
423 mice (Supp Fig 3F) without affecting time between nose pokes (Supp Fig 3G, H). In fasted

424 mice, rewarded nose pokes increased accumbal dopamine release in both WT and KO mice  
425 (Fig 4I, J) with a significant main effect for a reduced AUC and max z-score in KO mice in  
426 response to a rewarded nose poke (Fig 4K, L). We then aligned photometry data to pellet  
427 retrieval to account for any potential differences in pellet retrieval time (Fig 4M-O). AUC and  
428 max z-score analysis revealed no significant genotype effects prior to pellet retrieval (Fig 4P,  
429 Q), however AUC and max z-score were both significantly reduced in fasted KO mice  
430 compared to fasted WT mice after pellet retrieval (Fig 4R, S). These results are consistent  
431 with behavioural data showing that reduced accumbal dopamine release in response to  
432 pellet retrieval underpins reduced motivation for a palatable food reward in fasted KO mice.  
433 We also examined dopamine release in the dorsal striatum during a progressive ratio  
434 schedule (Fig 5A, B). Aligning dorsal striatal dopamine release to rewarded and non-  
435 rewarded nose pokes showed an immediate increase in rewarded pokes with no response in  
436 non-rewarded pokes (Fig 5C-G). There were no acute differences in dorsal striatal dopamine  
437 release between WT and KO mice and there were no differences in release in fed vs fasted  
438 mice (Fig 5H, I). When aligned to pellet retrieval, dorsal striatal dopamine peaked  
439 immediately prior to retrieval (Fig 5J-L) with no significant differences in AUC or max z-score  
440 prior to pellet retrieval between genotypes in fed or fasted states (Fig 5M, N). There was a  
441 significant reduction in AUC after pellet retrieval in fasted KO mice compared to fasted WT  
442 mice, with no difference for max z-score (Fig 5O, P).

443

444

445

446

447

448 **Discussion**

449 While AgRP neurons replicate the actions of hunger on motivated behaviour and midbrain  
450 dopamine neurons<sup>7,12-14</sup>, the exact mechanism by which these neurons sense hunger to  
451 influence dopamine release and motivated behaviour is unknown. In this study, we  
452 demonstrate that intact glucose-sensing via Crat in AgRP neurons during fasting is required  
453 to increase dopamine release in NAc and dorsal striatum and increased motivated  
454 responding for food rewards. The study highlights that hunger-sensing in AgRP neurons  
455 potentiates dopamine release in response to food rewards and specifically identifies Crat in  
456 AgRP neurons as a potential molecular target to reduce motivation to consume palatable  
457 foods.

458 Deletion of Crat directly impairs glucose-sensing in AgRP neurons. These results are  
459 supported by studies deleting Crat from myocytes, as this diminishes the switch from fatty  
460 acid metabolism to glucose catabolism after pyruvate administration<sup>37</sup>. The lack of genotype  
461 differences in excitatory or inhibitory postsynaptic potentials show that changes in glucose-  
462 sensing are not caused by altered synaptic input, but rather reflects changes in the intrinsic  
463 glucose-sensing capability of AgRP neurons following Crat deletion. Indeed, an unbiased  
464 proteomic survey of AgRP neurons with or without Crat identified numerous differences in  
465 proteins regulating synaptic plasticity, particularly in the fasted state<sup>25</sup>. Taken together, our  
466 electrophysiological results demonstrated that Crat deletion impairs glucose sensing in  
467 AgRP neurons, particularly during low energy states.

468 AgRP neurons also regulate taste modification in fasted states by potentiating sweet taste  
469 sensing at lower sucrose concentrations or by increasing the tolerance of a bitter tastant in  
470 sucrose<sup>34</sup>. During fasting, KO mice showed a significantly lower preference for sucrose  
471 consumption and a significantly stronger aversion to sucrose laced with quinine compared to  
472 WT mice, which did not change during fasting. WT mice, however, increased their  
473 preference for sucrose laced with quinine during fasting. These studies indicate that during  
474 fasting WT, but not KO mice, seek calories in solutions with low taste appeal, suggesting  
475 that KO mice cannot sense the caloric value of sucrose during fasting. This is in line with  
476 studies demonstrating that calories are inherently rewarding irrespective of taste<sup>38</sup>, implying  
477 the inability of KO mice to sense calorie content does not reinforce consumption. Sucrose  
478 ingestion is reinforced by dopamine release in the dorsal striatum and NAc and studies  
479 demonstrate that dopamine release in the dorsal striatum reinforces the caloric value,  
480 whereas dopamine release in the NAc reinforces the hedonic value (taste) of sucrose<sup>35</sup>.  
481 Importantly, this study demonstrates that dopamine release in the dorsal striatum (simulating  
482 caloric value) can override taste aversion. Similar to this, our PET/CT studies for fDOPA  
483 revealed reduced dopamine uptake 30 mins after food reward in KO mice, with no difference  
484 in the ventral striatum. We suggest the impaired glucose-sensing capacity of AgRP neurons

485 underlies the reduced dopamine uptake in the dorsal striatum of KO mice, since disrupting  
486 glucose oxidation suppressed dorsal striatum dopamine efflux during sugar intake<sup>39</sup>. Thus,  
487 we predict that Crat in AgRP neurons is important to detect post-ingestive signals of calorie  
488 content and relay this information into relevant dopamine circuits, such as the dorsal  
489 striatum. Indeed, AgRP neurons respond within minutes to post-ingestive signals from the  
490 gut, such as nutrients and hormones released into the blood or via neural pathways<sup>22-24,40</sup>.  
491 Studies in humans show palatable food elicits an immediate orosensory dopamine response  
492 and a delayed dorsal striatum dopamine response<sup>36</sup>. While the PET/CT scanning approach  
493 detected a difference in the dorsal striatum of KO mice after 30 minutes, a major limitation  
494 with the PET/CT approach is the lack of temporal resolution around the food approach and  
495 consumption, as well as spatial resolution to the NAc. To overcome this, we employed a  
496 photometry approach using GRAB<sup>DA</sup> to measure dopamine release dynamics<sup>28</sup> in the NAc  
497 and dorsal striatum before and immediately after food consumption. Although both WT and  
498 KO mice spent equal time consuming the peanut butter chip, KO had significantly attenuated  
499 dopamine release in the NAc, in fasted state. In the dorsal striatum, we observed  
500 coordinated ramping prior to pellet retrieval similar to previous reports<sup>41</sup>, but there were no  
501 acute differences in the dorsal striatum dopamine release. Thus, our studies demonstrate  
502 that acute fasting-induced release of dopamine in the NAc to a palatable food reward  
503 requires metabolic input from AgRP neurons.  
504 Importantly, Crat deletion in AgRP neurons also attenuated progressive ratio operant  
505 responding for sucrose rewards during fasting with KO mice showing reduced breakpoint  
506 ratio, active nose pokes and pellets consumed. Although the motivation to obtain food is  
507 associated with activation of AgRP neurons<sup>7,12</sup>, our studies provide a molecular mechanism  
508 responsible for translating low energy availability into a dopamine-driven motivational action  
509 to consume sucrose. We used a home-cage operant self-administration approach by placing  
510 FED3 in the home cages of mice. This provides advantages such as reducing handling  
511 stress, but most importantly, mice did not require food restriction to learn the action-outcome  
512 (nose poke-sucrose pellet) contingency and there were no differences in acquisition rates  
513 between WT and KO mice. This was important because differential responses to food  
514 restriction, as shown previously<sup>25,42</sup>, may have impaired subsequent responding during the  
515 progressive ratio tests.  
516 Using FED3 coupled with GRAB<sub>DA</sub> we measured dopamine release in the NAc or dorsal  
517 striatum during a progressive ratio session in response to rewarded and non-rewarded nose  
518 pokes. In the NAc, dopamine release increased prior to pellet retrieval and while there were  
519 no differences in AUC or max z-score prior to pellet retrieval, both these parameters were  
520 significantly reduced in KO mice under fasted conditions. The combination of reduced  
521 breakpoint responding and lower dopamine release in the NAc to pellet retrieval is

522 consistent with the known role of NAc dopamine release to drive food seeking<sup>43</sup> and to  
523 assign an appropriate investment of effort to the available reward<sup>44-46</sup>. In the dorsal striatum,  
524 dopamine ramping was observed prior to pellet retrieval without any genotype differences,  
525 which dropped to baseline soon after pellet retrieval consistent with previous reports<sup>41</sup>.  
526 Interestingly, AUC analysis after pellet retrieval suggest KO mice have a faster return to  
527 baseline, although how this might reflect reduced motivational drive is unknown. When  
528 considered together, both GRAB<sub>DA</sub> photometry and PET/CT studies with fDOPA reveal KO  
529 mice have deficits in acute orosensory NAc dopamine release and long-term post-ingestive  
530 dorsal striatum dopamine release, similar to studies conducted in humans<sup>36</sup>. Thus, we  
531 predict both reduced acute dopamine release in the NAc in response to pellet retrieval and  
532 longer-term deficits in dopamine uptake in the dorsal striatum (30 mins) underlie reduced  
533 motivational drive to consume sucrose rewards in KO, compared to WT mice.

534 Most of the observed deficits in KO mice in the present study manifested in the fasted state,  
535 including changes in glucose-sensing, sucrose preference, NAc dopamine release and  
536 during progressive ratio operant responding. Our previous studies showed that deletion of  
537 Crat from AgRP neurons reduced food intake after fasting, impaired the AgRP proteomic  
538 response to fasting and impaired homeostatic changes to calorie restriction and time-  
539 restricted feeding<sup>25,42,47</sup>. Taken together, these studies highlight the major role of Crat in  
540 AgRP neurons is to facilitate the metabolic adaptation to low energy availability. This is  
541 unsurprising given AgRP neurons respond to low energy availability by increasing firing  
542 frequency and gene transcription<sup>16-20</sup> in order to maintain hunger signaling and appetitive  
543 motivation. The importance of AgRP neurons to respond to hunger is underscored by the  
544 starvation caused following genetic ablation of AgRP neurons<sup>6,8</sup>.

545 An unanswered question remains, as to how AgRP neurons influence mesolimbic dopamine  
546 signaling. Given that very few, if any, AgRP terminals are found in the VTA<sup>14</sup>, it seems  
547 unlikely that AgRP neurons directly affect dopaminergic neurons in the VTA. In addition,  
548 dissociable dopamine dynamics differentially regulate learning and motivational properties,  
549 with dopamine release in NAc underlying motivational properties and VTA firing properties  
550 underlying learning properties<sup>46</sup>. Based on these observations, AgRP neurons presumably  
551 influence mechanisms in the NAc that promote dopamine release. Although the MC4R is  
552 found in the NAc<sup>48</sup>, there is little evidence to suggest activation of AgRP directly targets  
553 neurons in the NAc. Activation of AgRP nerve terminals in the lateral hypothalamus (LH), but  
554 not the paraventricular hypothalamic nucleus, increased taste reactivity to sucrose<sup>34</sup>,  
555 suggesting the LH may be an indirect route, through which AgRP neurons influence  
556 mesolimbic dopamine release. This is consistent with the known role of the LH in mediating  
557 appetitive motivation and food consumption<sup>49</sup>. Finally, the suppression of AgRP neuronal  
558 activity with food presentation occurs prior to consumption<sup>11,18,21</sup> and this coincides with



559 increased NAc and dorsal striatum dopamine release prior to pellet consumption. Whether  
560 or not these changes are functionally related remains to be determined but activation of  
561 AgRP neurons also drives dopamine release in the NAc<sup>13</sup> so a number of questions remain  
562 to be answered, as to how AgRP neurons facilitate dopamine release.

563 In summary, we show that Crat in AgRP neurons is required 1) for appropriate glucose-  
564 sensing, 2) to transmit fasting-induced metabolic information to dopamine release in the NAc  
565 and dorsal striatum, albeit over different time frames and 3) to increased motivated  
566 behaviour for sucrose rewards. Since the motivation to eat depends not only on the  
567 palatability of food, but also metabolic state<sup>50,51</sup>, these studies identify a novel molecular  
568 target in hunger-sensing AgRP neurons to control the overconsumption of palatable foods.  
569 Whether or not this plays an important role in obesity remains to be determined since  
570 obesity desensitizes AgRP neurons to food cues and metabolic feedback<sup>52</sup>. However, the  
571 observation that fasting increases NAc dopamine release in response to high fat diet, when  
572 compared to chow diet<sup>15</sup>, suggests that homeostatic circuits might play an important role in  
573 the pathogenesis of obesity. Future research is required to disentangle how homeostatic  
574 signals influence food reward processing and how this contributes to obesity.

575

576

577

578

579

580

581

582

583

584

585

586

587    **REFERENCES**

- 588    1     Sih, A. Optimal behavior: can foragers balance two conflicting demands? *Science*  
589        **210**, 1041-1043, (1980).
- 590    2     Whitham, J. & Mathis, A. Effects of hunger and predation risk on foraging behavior of  
591        graybelly salamanders, *Eurycea multiplicata*. *J Chem Ecol* **26**, 1659-1665, (2000).
- 592    3     Goldstone, A. P. *et al.* Fasting biases brain reward systems towards high-calorie  
593        foods. *Eur J Neurosci* **30**, 1625-1635, (2009).
- 594    4     Cameron, J. D., Goldfield, G. S., Finlayson, G., Blundell, J. E. & Doucet, E. Fasting  
595        for 24 hours heightens reward from food and food-related cues. *PLoS One* **9**,  
596        e85970, (2014).
- 597    5     Aponte, Y., Atasoy, D. & Sternson, S. M. AGRP neurons are sufficient to orchestrate  
598        feeding behavior rapidly and without training. *Nature neuroscience* **14**, 351-355,  
599        (2011).
- 600    6     Gropp, E. *et al.* Agouti-related peptide-expressing neurons are mandatory for  
601        feeding. *Nature Neuroscience* **8**, 1289-1291, (2005).
- 602    7     Krashes, M. J. *et al.* Rapid, reversible activation of AgRP neurons drives feeding  
603        behavior in mice. *J Clin Invest* **121**, 1424-1428, (2011).
- 604    8     Luquet, S., Perez, F. A., Hnasko, T. S. & Palmiter, R. D. NPY/AgRP neurons are  
605        essential for feeding in adult mice but can be ablated in neonates. *Science* **310**, 683-  
606        685, (2005).
- 607    9     Ruan, H. B. *et al.* O-GlcNAc transferase enables AgRP neurons to suppress  
608        browning of white fat. *Cell* **159**, 306-317, (2014).
- 609    10    Atasoy, D., Betley, J. N., Su, H. H. & Sternson, S. M. Deconstruction of a neural  
610        circuit for hunger. *Nature* **488**, 172-177, (2012).
- 611    11    Betley, J. N. *et al.* Neurons for hunger and thirst transmit a negative-valence teaching  
612        signal. *Nature* **521**, 180-185, (2015).
- 613    12    Chen, Y. M., Lin, Y. C., Zimmerman, C. A., Essner, R. A. & Knight, Z. A. Hunger  
614        neurons drive feeding through a sustained, positive reinforcement signal. *eLife* **5**,  
615        (2016).
- 616    13    Alhadeff, A. L. *et al.* Natural and Drug Rewards Engage Distinct Pathways that  
617        Converge on Coordinated Hypothalamic and Reward Circuits. *Neuron* **103**, 891-+,  
618        (2019).
- 619    14    Dietrich, M. O. *et al.* AgRP neurons regulate development of dopamine neuronal  
620        plasticity and nonfood-associated behaviors. *Nat Neurosci* **15**, 1108-1110, (2012).
- 621    15    Mazzone, C. M. *et al.* High-fat food biases hypothalamic and mesolimbic expression  
622        of consummatory drives. *Nature Neuroscience* **23**, 1253-+, (2020).
- 623    16    Baskin, D. G., Breininger, J. F. & Schwartz, M. W. Leptin receptor mRNA identifies a  
624        subpopulation of neuropeptide Y neurons activated by fasting in rat hypothalamus.  
625        *Diabetes* **48**, 828-833, (1999).
- 626    17    Briggs, D. I., Lemus, M. B., Kua, E. & Andrews, Z. B. Diet-induced obesity attenuates  
627        fasting-induced hyperphagia. *J Neuroendocrinol* **23**, 620-626, (2011).
- 628    18    Mandelblat-Cerf, Y. *et al.* Arcuate hypothalamic AgRP and putative POMC neurons  
629        show opposite changes in spiking across multiple timescales. *eLife* **4**, (2015).
- 630    19    Schwartz, M. W., Erickson, J. C., Baskin, D. G. & Palmiter, R. D. Effect of fasting and  
631        leptin deficiency on hypothalamic neuropeptide Y gene transcription in vivo revealed  
632        by expression of a lacZ reporter gene. *Endocrinology* **139**, 2629-2635, (1998).
- 633    20    Yang, Y., Atasoy, D., Su, H. H. & Sternson, S. M. Hunger states switch a flip-flop  
634        memory circuit via a synaptic AMPK-dependent positive feedback loop. *Cell* **146**,  
635        992-1003, (2011).
- 636    21    Chen, Y., Lin, Y. C., Kuo, T. W. & Knight, Z. A. Sensory detection of food rapidly  
637        modulates arcuate feeding circuits. *Cell* **160**, 829-841, (2015).
- 638    22    Su, Z. W., Alhadeff, A. L. & Betley, J. N. Nutritive, Post-ingestive Signals Are the  
639        Primary Regulators of AgRP Neuron Activity. *Cell reports* **21**, 2724-2736, (2017).

- 640 23 Beutler, L. R. *et al.* Dynamics of Gut-Brain Communication Underlying Hunger.  
641 *Neuron* **96**, 461-+, (2017).
- 642 24 Goldstein, N. *et al.* Hypothalamic detection of macronutrients via multiple gut-brain  
643 pathways. *Cell Metabolism* **33**, 1-12, (2021).
- 644 25 Reichenbach, A. *et al.* AgRP Neurons Require Carnitine Acetyltransferase to  
645 Regulate Metabolic Flexibility and Peripheral Nutrient Partitioning. *Cell reports* **22**,  
646 1745-1759, (2018).
- 647 26 Kinahan, P. E. & Fletcher, J. W. Positron Emission Tomography-Computed  
648 Tomography Standardized Uptake Values in Clinical Practice and Assessing  
649 Response to Therapy. *Semin Ultrasound Ct* **31**, 496-505, (2010).
- 650 27 Mani, B. K. *et al.* The role of ghrelin-responsive mediobasal hypothalamic neurons in  
651 mediating feeding responses to fasting. *Mol Metab* **6**, 882-896, (2017).
- 652 28 Sun, F. M. *et al.* A Genetically Encoded Fluorescent Sensor Enables Rapid and  
653 Specific Detection of Dopamine in Flies, Fish, and Mice. *Cell* **174**, 481-+, (2018).
- 654 29 Lerner, T. N. *et al.* Intact-Brain Analyses Reveal Distinct Information Carried by SNc  
655 Dopamine Subcircuits. *Cell* **162**, 635-647, (2015).
- 656 30 Barker, D. J. *et al.* Lateral Preoptic Control of the Lateral Habenula through  
657 Convergent Glutamate and GABA Transmission. *Cell reports* **21**, 1757-1769, (2017).
- 658 31 Matikainen-Ankney, B. A. *et al.* Feeding Experimentation Device version 3 (FED3):  
659 An open-source home-cage compatible device for measuring food intake and  
660 operant behavior. *bioRxiv*, (2020).
- 661 32 Richardson, N. R. & Roberts, D. C. S. Progressive ratio schedules in drug self-  
662 administration studies in rats: A method to evaluate reinforcing efficacy. *J Neurosci*  
663 *Methods* **66**, 1-11, (1996).
- 664 33 van den Top, M. *et al.* The impact of ageing, fasting and high-fat diet on central and  
665 peripheral glucose tolerance and glucose-sensing neural networks in the arcuate  
666 nucleus. *J Neuroendocrinol* **29**, (2017).
- 667 34 Fu, O. *et al.* Hypothalamic neuronal circuits regulating hunger-induced taste  
668 modification. *Nature communications* **10**, (2019).
- 669 35 Tellez, L. A. *et al.* Separate circuitries encode the hedonic and nutritional values of  
670 sugar. *Nature Neuroscience* **19**, 465-+, (2016).
- 671 36 Thanarajah, S. E. *et al.* Food Intake Recruits Orosensory and Post-ingestive  
672 Dopaminergic Circuits to Affect Eating Desire in Humans. *Cell Metabolism* **29**, 695-+,  
673 (2019).
- 674 37 Muoio, D. M. *et al.* Muscle-specific deletion of carnitine acetyltransferase  
675 compromises glucose tolerance and metabolic flexibility. *Cell Metab* **15**, 764-777,  
676 (2012).
- 677 38 de Araujo, I. E. *et al.* Food reward in the absence of taste receptor signaling. *Neuron*  
678 **57**, 930-941, (2008).
- 679 39 Tellez, L. A. *et al.* Glucose utilization rates regulate intake levels of artificial  
680 sweeteners. *J Physiol-London* **591**, 5727-5744, (2013).
- 681 40 Bai, L. *et al.* Genetic Identification of Vagal Sensory Neurons That Control Feeding.  
682 *Cell* **179**, 1129-+, (2019).
- 683 41 London, T. D. *et al.* Coordinated Ramping of Dorsal Striatal Pathways preceding  
684 Food Approach and Consumption. *Journal of Neuroscience* **38**, 3547-3558, (2018).
- 685 42 Reichenbach, A. *et al.* Carnitine Acetyltransferase in AgRP Neurons Is Required for  
686 the Homeostatic Adaptation to Restricted Feeding in Male Mice. *Endocrinology* **159**,  
687 2473-2483, (2018).
- 688 43 Roitman, M. F., Stuber, G. D., Phillips, P. E. M., Wightman, R. M. & Carelli, R. M.  
689 Dopamine operates as a subsecond modulator of food seeking. *Journal of*  
690 *Neuroscience* **24**, 1265-1271, (2004).
- 691 44 Hamid, A. A. *et al.* Mesolimbic dopamine signals the value of work. *Nature*  
692 *Neuroscience* **19**, 117-+, (2016).

- 693 45 Howe, M. W., Tierney, P. L., Sandberg, S. G., Phillips, P. E. M. & Graybiel, A. M.  
694 Prolonged dopamine signalling in striatum signals proximity and value of distant  
695 rewards. *Nature* **500**, 575-+, (2013).
- 696 46 Mohebi, A. *et al.* Dissociable dopamine dynamics for learning and motivation. *Nature*  
697 **570**, 65-+, (2019).
- 698 47 Reichenbach, A. *et al.* Carnitine acetyltransferase (Crat) in hunger-sensing AgRP  
699 neurons permits adaptation to calorie restriction. *FASEB J*, fj201800634R, (2018).
- 700 48 Lim, B. K., Huang, K. W., Grueter, B. A., Rothwell, P. E. & Malenka, R. C. Anhedonia  
701 requires MC4R-mediated synaptic adaptations in nucleus accumbens. *Nature* **487**,  
702 183-U164, (2012).
- 703 49 Stuber, G. D. & Wise, R. A. Lateral hypothalamic circuits for feeding and reward.  
704 *Nature Neuroscience* **19**, 198-205, (2016).
- 705 50 Sun, X. *et al.* The neural signature of satiation is associated with ghrelin response  
706 and triglyceride metabolism. *Physiology & Behavior* **136**, 63-73, (2014).
- 707 51 Simon, J. J. *et al.* Integration of homeostatic signaling and food reward processing in  
708 the human brain. *Jci Insight* **2**, (2017).
- 709 52 Beutler, L. R. *et al.* Obesity causes selective and long-lasting desensitization of  
710 AgRP neurons to dietary fat. *eLife* **9**, (2020).

711

712

713 **FIGURE LEGENDS**

714 **Figure 1:** Crat deletion impairs glucose responsiveness of AgRP neurons. Intrinsic  
715 electrophysiological properties were little affected in KO versus WT mice including: resting  
716 membrane potential (A), input resistance (B), spontaneous action potential firing frequency  
717 (C), action potential amplitude (D). Spontaneous excitatory (E) and inhibitory (F) post-  
718 synaptic potentials compared in WT and KO mice in response to an increase in glucose from  
719 2mM to 5mM. Glucose responsive profiles of AgRP neurons from WT and KO mice  
720 characterised by their response to increased extracellular glucose concentration from 2mM  
721 to 5mM (G-H). Sample traces showing examples of glucose excited (top) and glucose  
722 inhibited (bottom) neurons in response to an increase in glucose from 2 to 5mM glucose.  
723 Data +/- SEM, two-way ANOVA with Tukey's post hoc analysis and unpaired students t-test;  
724 a, significant at  $p < 0.05$ .

725

726 **Figure 2:** Mice lacking Crat in AgRP neurons choose taste over calories during fasting.  
727 In a 2-bottle choice paradigm, mice had *ad libitum* access to chow for 4 days followed by an  
728 overnight fast. Position of bottles were swapped daily and volume consumed overnight  
729 recorded. Bottles were washed after each choice pair and mice had 2 days of water in both  
730 bottles. Dark coloured dots represent female mice (6 WT, 6 KO), shaded dots male mice (5  
731 WT, 7 KO). Pie charts show preference for saccharin (light blue) and comparator solution  
732 (dark blue). After acclimation to the BioDaq cages, mice received choice of water and 0.1%  
733 saccharin (A), 4% sucrose and 0.1% saccharin (B+C) or 4% sucrose laced with 0.1mM  
734 Quinine and 0.1% saccharin (D+E). Change in preference towards caloric quinine /sucrose  
735 solution during fasting in WT (F) and KO (G). Combined fluid consumption for each part of  
736 the experiment (H) and dose response curve for higher quinine concentrations in 4%  
737 sucrose solution from different cohorts of mice ( $n=5-14$ ). (I). Data +/- SEM, two-way ANOVA  
738 with Tukey's post hoc analysis and unpaired students t-test; a, significant at  $p < 0.05$ .

739

740 **Figure 3:** deficits in glucose sensing in AgRP neurons affects dopamine signalling.  
741 Experimental design to examine dopamine signalling in Nucleus accumbens. (A): Female (3  
742 WT, 4 KO) and male (4 WT, 4 KO) mice trained to receive peanut butter chips were tethered  
743 to a fiber optic cable in their home cage and allowed time to acclimatize to it. Then the  
744 dopamine response to a wood dowel (a, black), standard chow (b, tangerine), and peanut  
745 butter chip (c, blue) were measured. Schematic of GRAB<sub>DA</sub> (AAV-hSyn-DA4.3) injection site  
746 in the Nucleus accumbens and fiber placement (B). Average dopamine traces aligned to  
747 object dropping into cage of fed (C+D) and fasted (G+H) mice and AUC (E+I) and max z-  
748 Score (F+J) of the dopamine signal in response to it. Average dopamine traces aligned to

749 first contact with peanut butter chip from fed (K) and fasted (L) mice, individual traces in  
750 heatmap (M), AUC (N) and max z-Score during peanut butter consumption. Time passed  
751 between drop and contact with peanut butter (P) and time spent eating (Q). Data +/- SEM,  
752 two-way ANOVA with Tukey's post hoc analysis; a, significant at  $p < 0.05$

753

754 **Figure 4:** deficits in AgRP glucose sensing affects motivation for sucrose rewards during  
755 fasting. Mice (8 WT, 9 KO) were trained to nose poke for sucrose rewards using fixed ratio  
756 schedule (FR1, FR3, FR5) to reliably nose poke on average 75% correct for 3 consecutive  
757 nights before undergoing PR schedules with or without chow accessible (A). Break point  
758 from fed and fasted mice (B) and correct nose pokes of fasting PR session (C). Schematic of  
759 GRAB<sub>DA</sub> (AAV-hSyn-DA4.3) injection site in the Nucleus accumbens and fiber placement  
760 (D). Experimental design (E): mice with fiber implant (same as in Figure 3) were trained to  
761 nose poke as described and tethered to a fiber optic cable in their home cage with FED3 not  
762 accessible. After 5 min acclimation mice gained access to FED3 on PR schedule. Combined  
763 average dopamine response of rewarded and non-rewarded correct nose pokes of 4 WT (F)  
764 and 4 KO (G) in fed state and 7 WT (I) and 6 KO (J) after overnight fast and heat map  
765 showing each rewarded nose poke(H). AUC (K) and max z-Score (L) of rewarded nose  
766 pokes. Average dopamine response to pellet retrieval in fed state (M) and after overnight  
767 fast (N) and heatmap showing individual responses (O). AUC (P+R) and max z-Score (Q+S)  
768 of dopamine traces prior to (-5 to 0 sec) and post (0 to 10 sec) pellet retrieval. Data +/- SEM,  
769 two-way ANOVA with Tukey's post hoc analysis; a, significant at  $p < 0.05$

770

771 **Figure 5.** AgRP glucose sensing is not required for dopamine signaling in the dorsal  
772 striatum for operant conditioning.

773 Schematic of GRAB<sub>DA</sub> (AAV-hSyn-DA4.3) injection site in the dorsal striatum and fiber  
774 placement (A). Experimental design (B): mice with fiber implant were trained to nose poke  
775 as described and tethered to a fiber optic cable in their home cage with FED3 not  
776 accessible. After 5 min acclimation mice gained access to FED3 on PR schedule. Combined  
777 average dopamine response of rewarded and non-rewarded correct nose pokes of 4 WT (C)  
778 and 4 KO (D) in fed state and 4 WT (F) and 4 KO (G) after overnight fast and heat map  
779 showing each rewarded nose poke (E). AUC (H) and max z-Score (I) of rewarded nose  
780 pokes. Average dopamine response to pellet retrieval in fed state (J) and after overnight fast  
781 (K) and heatmap showing individual responses (L). AUC (M+O) and max z-Score (N+P) of  
782 dopamine traces before (-5 to 0 sec) and after (0 to 10 sec) pellet retrieval. Data +/- SEM,  
783 two-way ANOVA with Tukey's post hoc analysis; a, significant at  $p < 0.05$

784

785

786

787

788

789 **SUPPLEMENTARY FIGURE LEGENDS**

790 Supplementary Figure 1

791 Saccharin Preference score for sucrose vs saccharin choice fed (A) and fasted (B), and for  
792 quinine/sucrose vs saccharin fed (C) and fasted (D). Change in preference towards sucrose  
793 with fasting in WT (E) and KO (F).

794 Experimental design for fDOPA PET scan (G): Mice were trained to receive Reese® peanut  
795 butter chips and then overnight fasted. On the experimental day, mice received ip injection  
796 of benserazide and entacapone to prevent peripheral breakdown of fDOPA (iv injection 30  
797 min afterwards). Mice were allowed to recover 5 min and then given 1 peanut butter chip,  
798 which they ate within 5 min. Then mice were anaesthetised and prepared for PET/CT scan  
799 and dopamine uptake in dorsal (H) and ventral striatum (I) measured. Baseline fDOPA  
800 uptake in dorsal striatum (J) and ventral striatum (K). Two-way ANOVA with Tukey's post  
801 hoc analysis and unpaired students t-test; a, significant at  $p < 0.05$

802

803 Supplementary Figure 2

804 Deficits in glucose sensing in AgRP neurons does not affect acute dopamine release in the  
805 dorsal striatum. Experimental design to examine dopamine signalling in dorsal striatum (A):  
806 Female (2 WT, 3 KO) and male (4 WT, 4 KO) mice trained to receive peanut butter chips  
807 were tethered to a fiber optic cable in their home cage and allowed time to acclimatize to it.  
808 Then the dopamine response to a wood dowel (a, black), standard chow (b, tangerine), and  
809 peanut butter chip (c, blue) were measured. Schematic of GRAB<sub>DA</sub> (AAV-hSyn-DA4.3)  
810 injection site in the dorsal striatum and fiber placement (B). Average dopamine traces  
811 aligned to object dropping into cage of fed (C+D) and fasted (G+H) mice and AUC (E+I) and  
812 max z-Score (F+J) of the dopamine signal in response to it. Average dopamine traces  
813 aligned to first contact with peanut butter chip from fed (K) and fasted (L) mice, individual  
814 traces in heatmap (M), AUC (N) and max z-Score during peanut butter consumption. Time  
815 passed between drop and contact with peanut butter (P) and time spent eating (Q). Two-way  
816 ANOVA with Tukey's post hoc analysis; a, significant at  $p < 0.05$

817

818 Supplementary Figure 3.

819 Received pellets during PR sessions (A) and incorrect nose pokes during fasting PR session  
820 over time (B). FR1, FR 3 and FR 5 training data (C). Example traces of fiber photometry  
821 recordings from the nucleus accumbens during PR sessions (blue line indicates correct nose  
822 pokes; pink lines represent pellet retrieval) in WT (D) and KO (E) after overnight fast. Time  
823 between rewarded poke and pellet retrieval (F), time between all correct nose pokes (G) and  
824 time between first 4 nose pokes (H) note the time scales are logarithmic. Two-way ANOVA  
825 with Tukey's post hoc analysis; a, significant at  $p < 0.05$



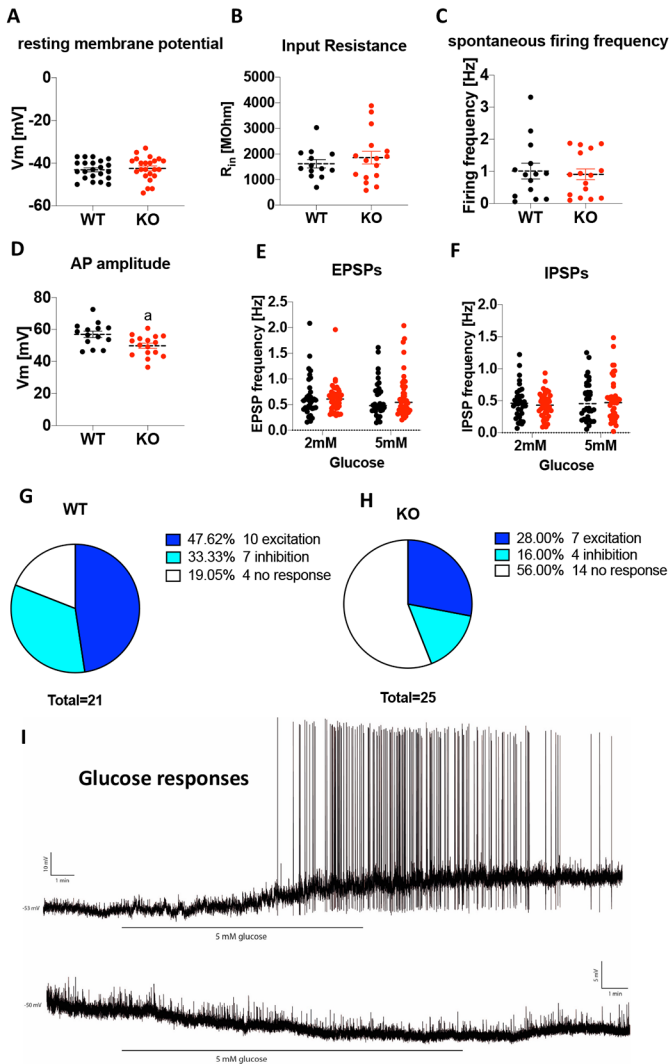

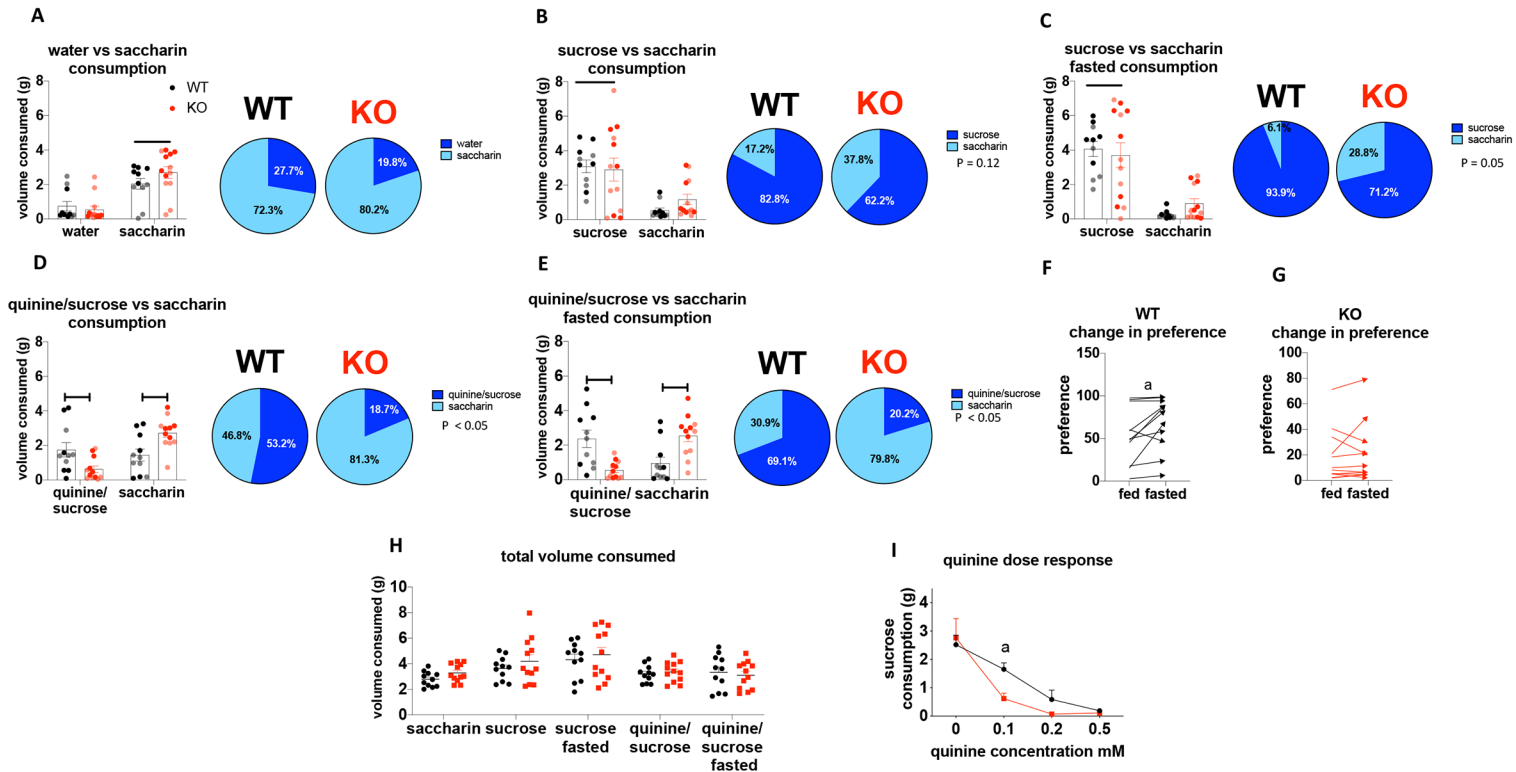

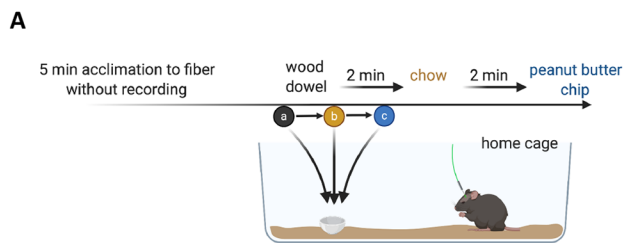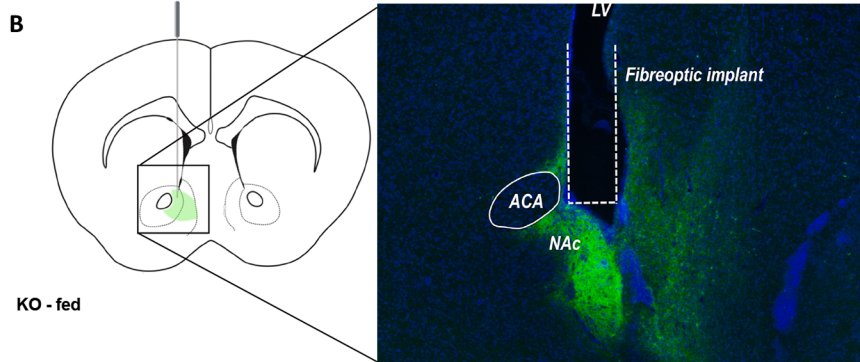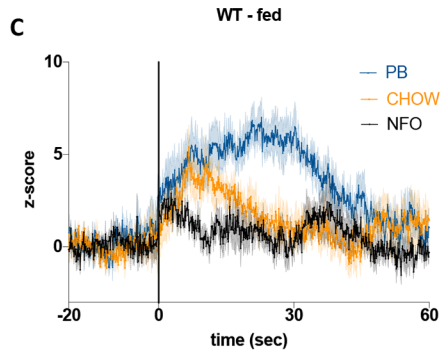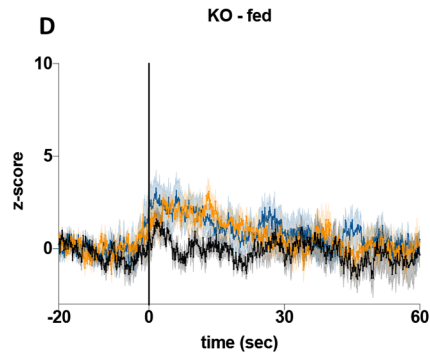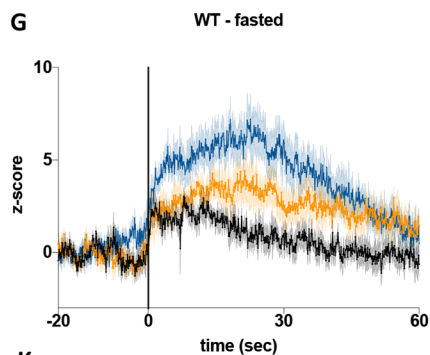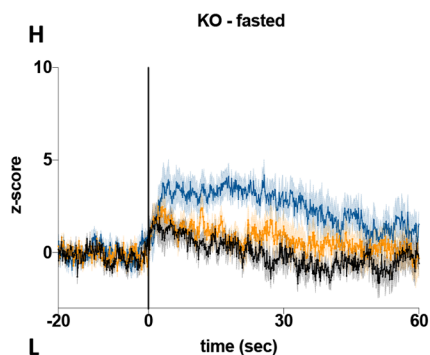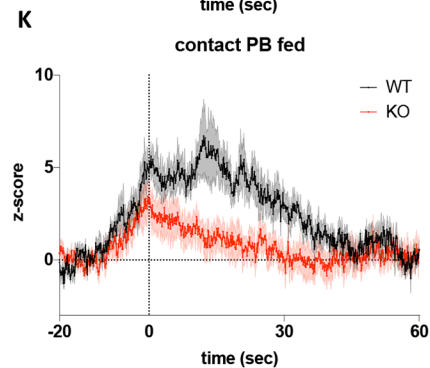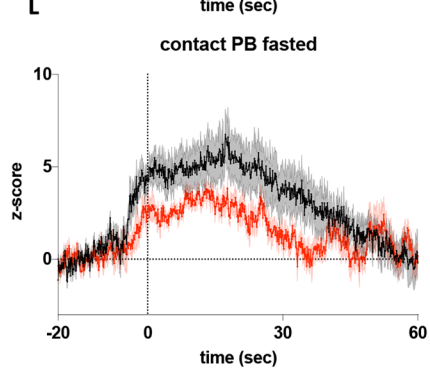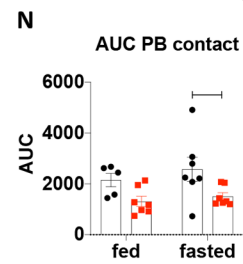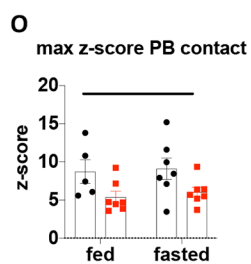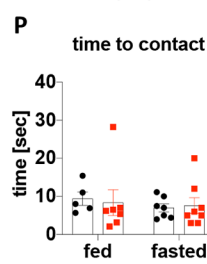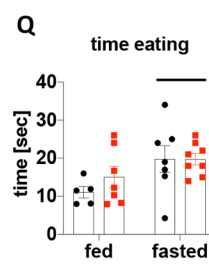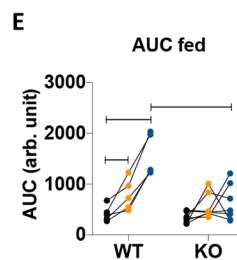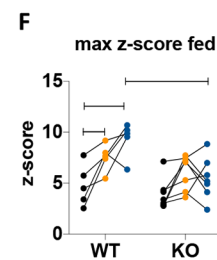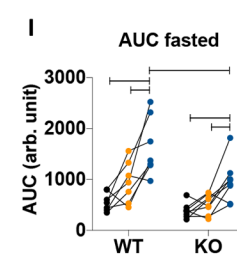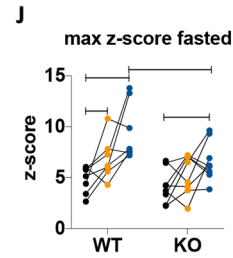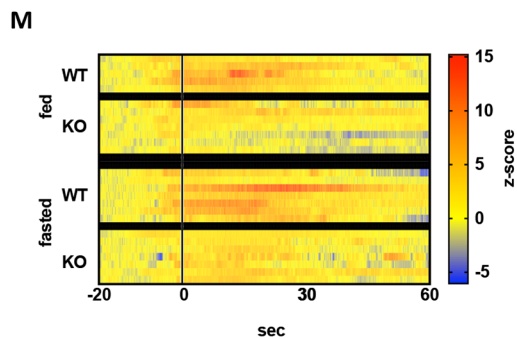

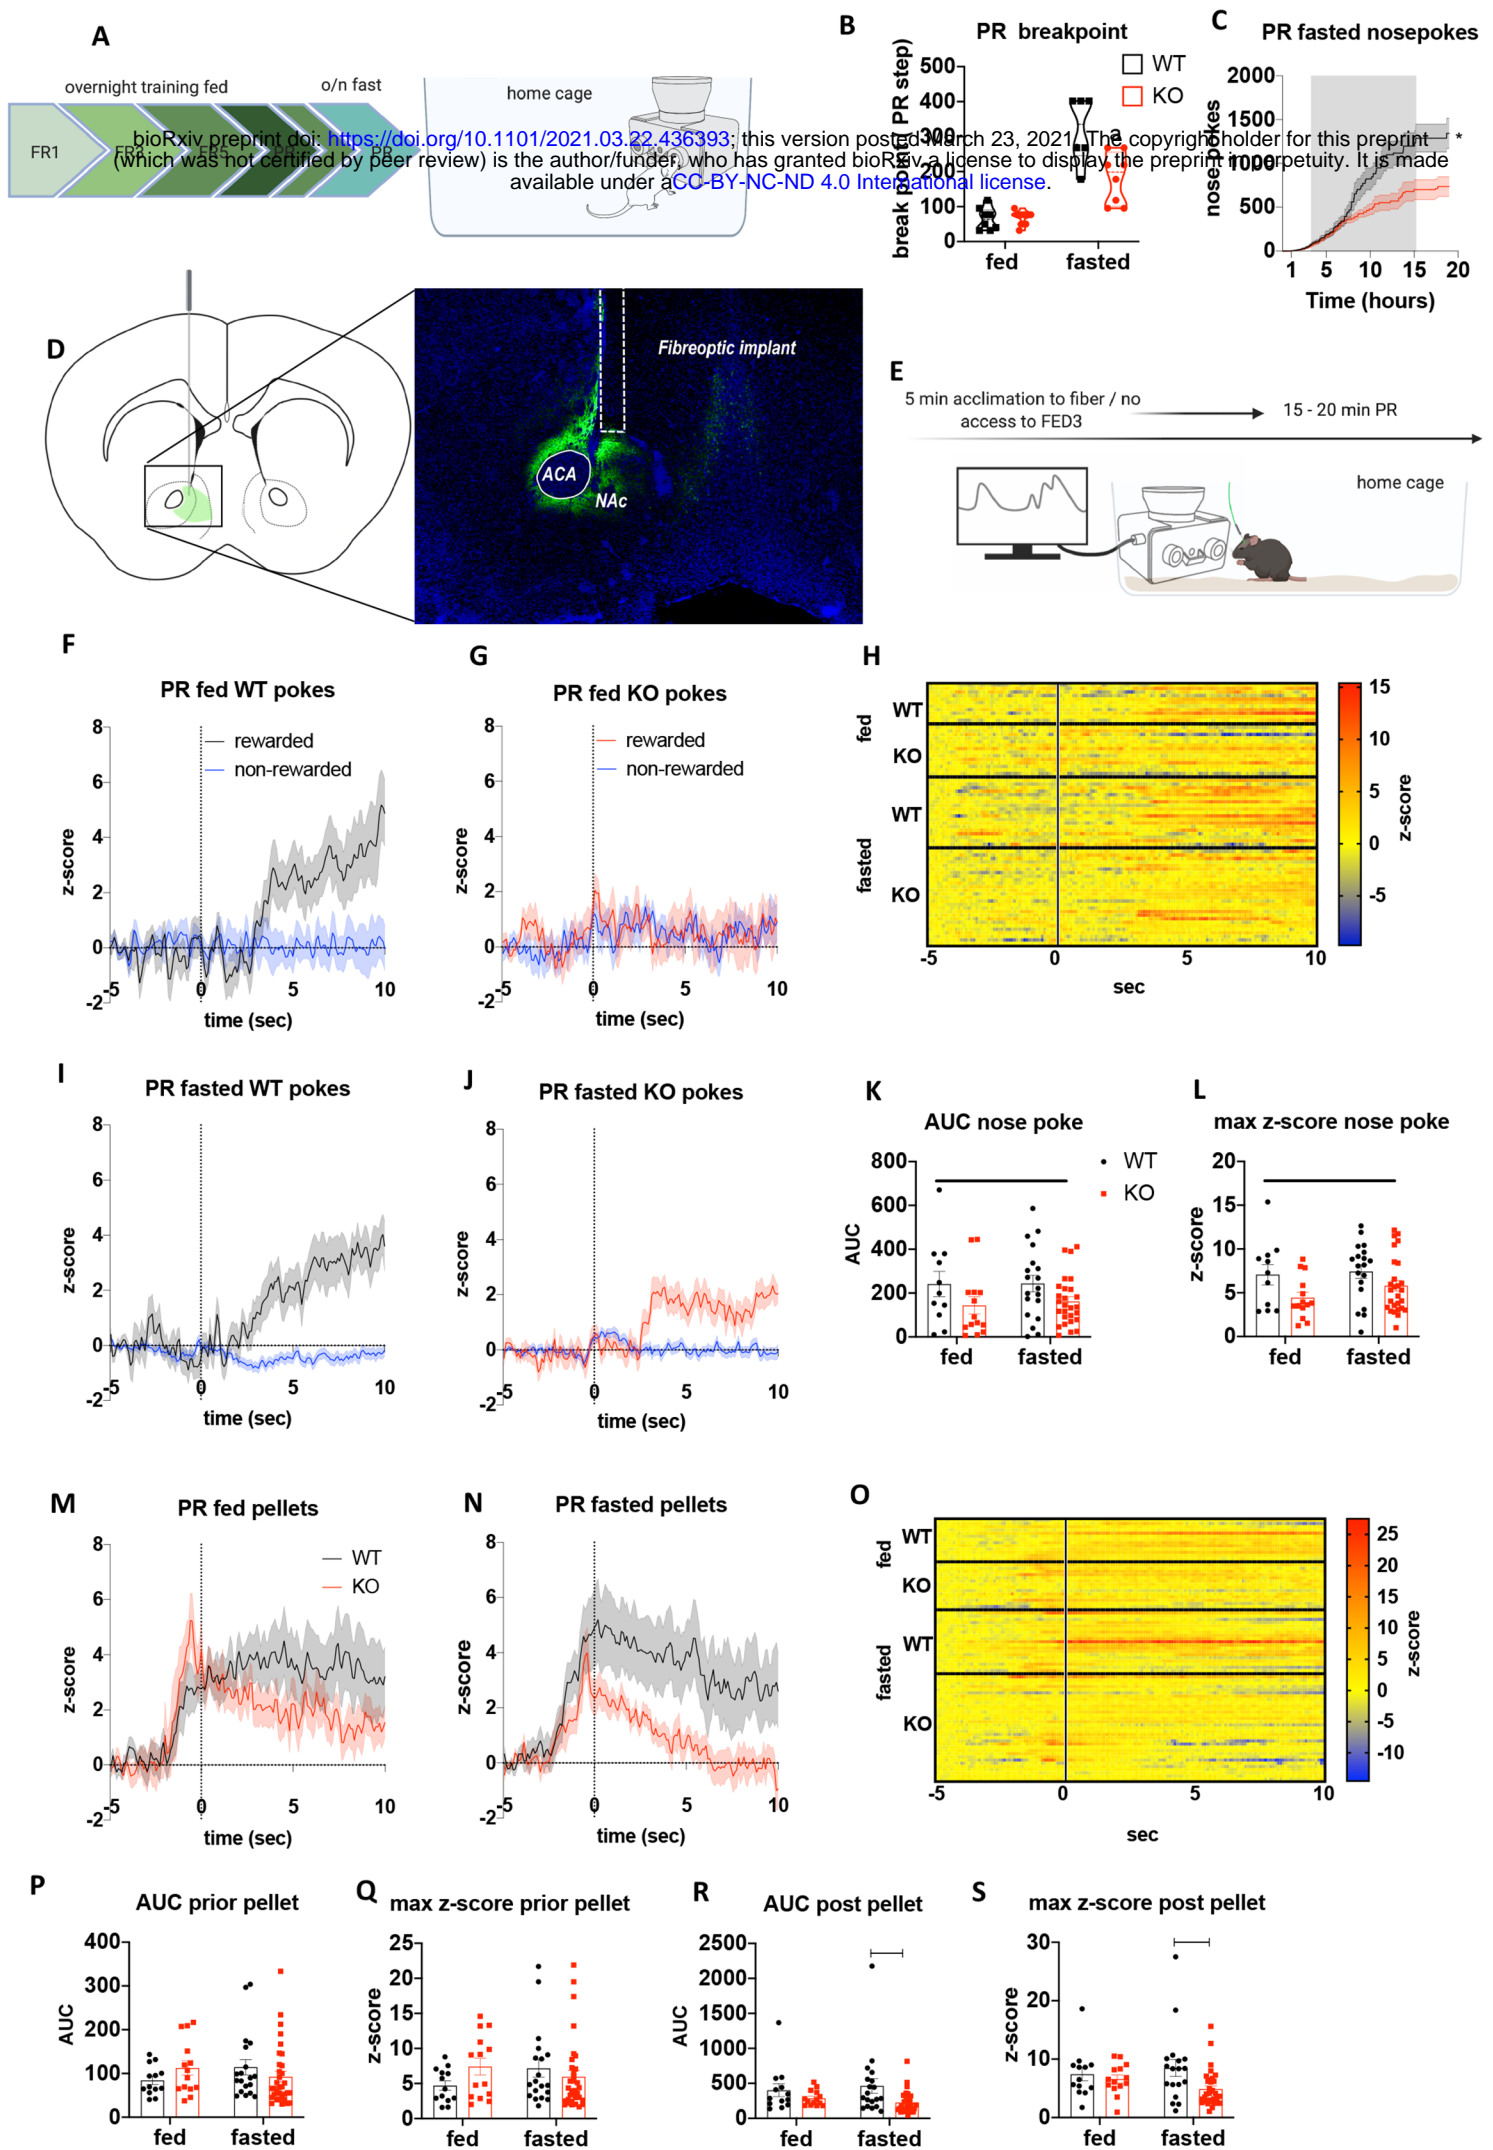

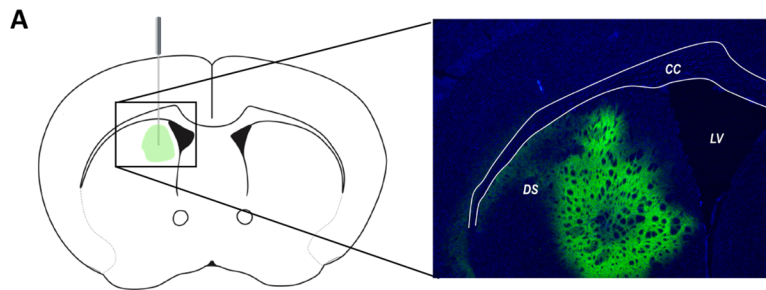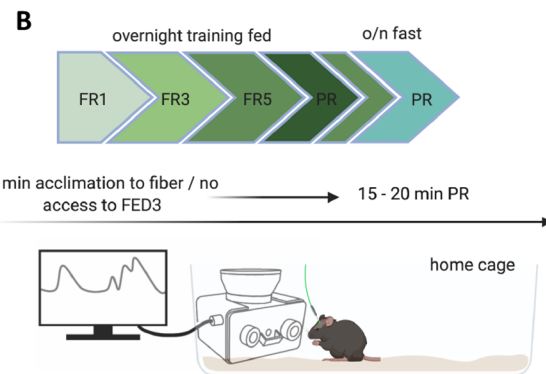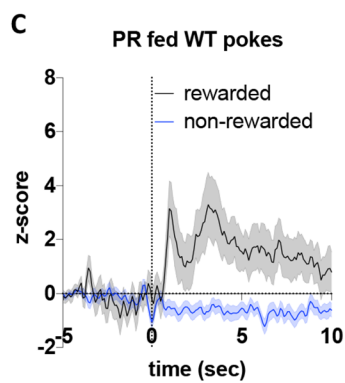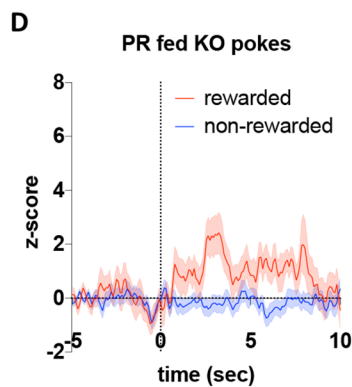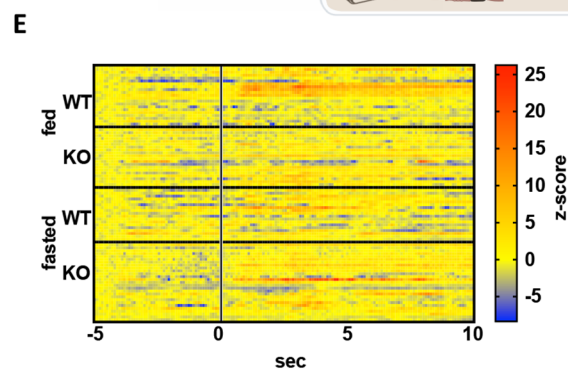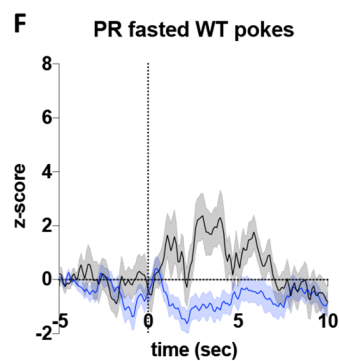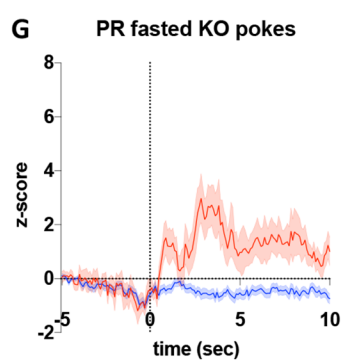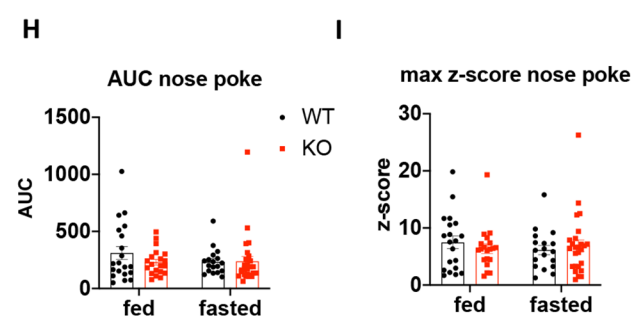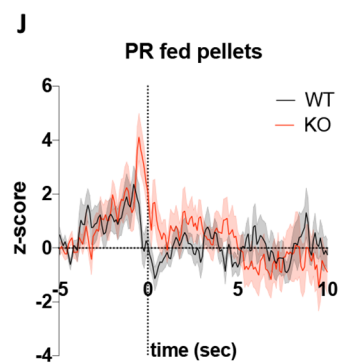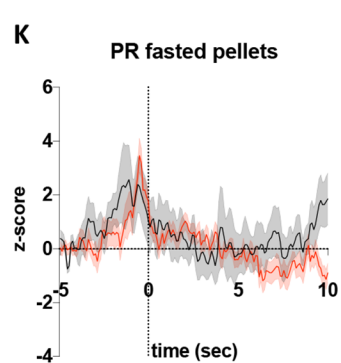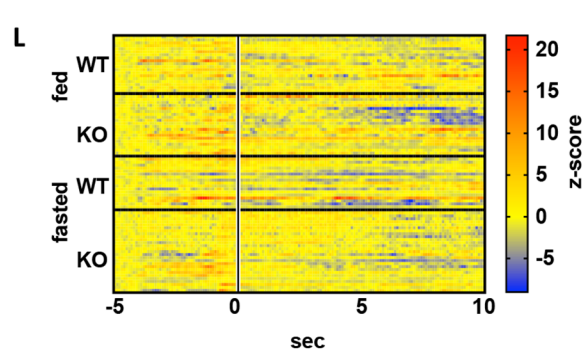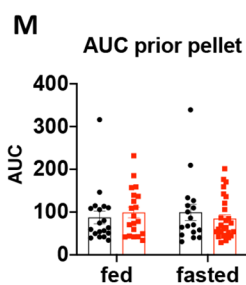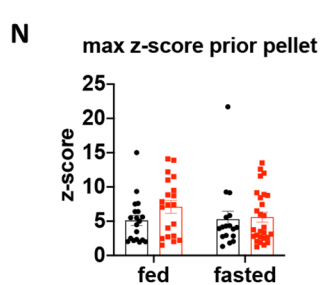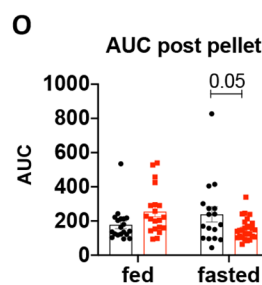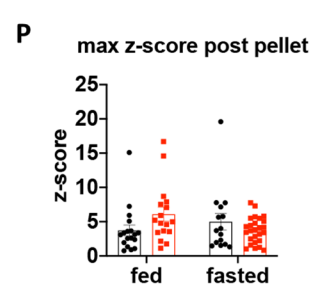

Source: https://www.biorxiv.org/content/10.1101/2021.03.22.436393v1.full.pdf
